# Supplementary material for: Design of a rhenium-decorated mesoporous nickel phyllosilicate-derived Ni–Re/MCM-41 catalyst for efficient hydrogenation of levulinic acid to γ-valerolactone
Source: Royal Society of Chemistry journal article supplement (doi:10.1039/d5gc06171g), 2026-01-01
Supplement: d5gc06171g1.pdf [file d5gc06171g1.pdf]

## Supplementary Information

### Design of Rhenium–Decorated Mesoporous Nickel Phyllosilicate– Derived Ni–Re/MCM-41 Catalyst for Efficient Hydrogenation of Levulinic Acid to $\gamma$ -Valerolactone

Yupawan Maneewong<sup>a+</sup>, Pratikkumar Lakhani<sup>a+</sup>, Sakhon Ratchahat<sup>a</sup>, Chularat Sakdaronnarong<sup>a</sup>,  
Wanwisa Limphirat<sup>b,c</sup>, Bunyarat Rungtaweevoranit<sup>d</sup>, Suttichai Assabumrungrat<sup>e,f</sup>,  
Kanyanat Khosukwiwat<sup>g</sup>, Kittisak Choojun<sup>g</sup>, Tawan Sooknoi<sup>g</sup>,  
Keiichi Tomishige<sup>h</sup>, and Atthapon Srifa<sup>a,\*</sup>

<sup>a</sup> Department of Chemical Engineering, Faculty of Engineering, Mahidol University, Nakhon Pathom 73170, Thailand

<sup>b</sup> Synchrotron Light Research Institute, Nakhon Ratchasima, 30000, Thailand

<sup>c</sup> Department of Chemical Engineering, Faculty of Engineering, Chulalongkorn University, Bangkok 10330, Thailand

<sup>d</sup> National Nanotechnology Center (NANOTEC), National Science and Technology Development Agency (NSTDA), Pathum Thani 12120, Thailand

<sup>e</sup> Center of Excellence on Catalysis and Catalytic Reaction Engineering, Department of Chemical Engineering, Faculty of Engineering, Chulalongkorn University, Bangkok 10330, Thailand

<sup>f</sup> Bio-Circular-Green-economy Technology & Engineering Center, BCGeTEC, Faculty of Engineering, Chulalongkorn University, Bangkok 10330, Thailand

<sup>g</sup> Department of Chemistry, Faculty of Science, King Mongkut's Institute of Technology Ladkrabang, Chalongkrung Road, Ladkrabang, Bangkok 10520, Thailand

<sup>h</sup> Department of Applied Chemistry, School of Engineering, Tohoku University, 6-6-07 Aoba, Aramaki, Aoba-ku, Sendai, 980-8579, Japan

<sup>+</sup>Y. Maneewong and P. Lakhani contributed equally to this work.

<sup>\*</sup> To whom correspondence should be addressed.

Tel.: +66(0)2 889-2138 ext. 6101-3; Fax: +66(0)2 889-2138 ext. 6129

Email address: atthapon.sri@mahidol.edu (A. Srifa)

| Entry            | Caption                                                                                                                                                                                                     | Page No.     |
|------------------|-------------------------------------------------------------------------------------------------------------------------------------------------------------------------------------------------------------|--------------|
| <b>1</b>         | General information of materials.                                                                                                                                                                           | <b>S3</b>    |
| <b>2</b>         | Characterization's techniques information.                                                                                                                                                                  | <b>S3-S4</b> |
| <b>Table S1</b>  | Summary of the XPS results obtained from the reduced catalysts.                                                                                                                                             | <b>S5</b>    |
| <b>Table S2</b>  | Experimental data for kinetic constant.                                                                                                                                                                     | <b>S6</b>    |
| <b>Table S3</b>  | Experimental data for activation energy.                                                                                                                                                                    | <b>S7</b>    |
| <b>Table S4</b>  | Catalytic performance comparison of Ni-based catalysts for levulinic acid (LA) hydrogenation to $\gamma$ -valerolactone (GVL), highlighting LA conversion and GVL yield.                                    | <b>S8</b>    |
| <b>Table S5</b>  | ICP-OES analysis of fresh and spent catalysts.                                                                                                                                                              | <b>S9</b>    |
| <b>Figure S1</b> | X-ray photoelectron spectroscopy (XPS) spectra of reduced and passivated catalysts: (a) and (b) Ni 2 <i>p</i> and (c) Re 4 <i>f</i> regions.                                                                | <b>S10</b>   |
| <b>Figure S2</b> | Reusability of the NiRe-PS catalyst over five consecutive catalytic cycles under identical reaction conditions (160 °C, 10 bar H <sub>2</sub> , 2 h, 0.1 g catalyst).                                       | <b>S11</b>   |
| <b>Figure S3</b> | <sup>1</sup> H NMR spectrum of the reaction product obtained over the NiRe-PS catalyst.                                                                                                                     | <b>S12</b>   |
| <b>Figure S4</b> | Spent catalyst characterization of NiRe-PS after the first catalytic run (a) TEM and elemental mapping; (b) XPS spectra of Ni 2 <i>p</i> and Re 4 <i>f</i> regions; (c) XRD patterns; and (d) TGA profiles. | <b>S13</b>   |

## 1 General information of materials.

MCM-41 was obtained from ACS Material LLC with a purity of 99%. Nickel(II) nitrate hexahydrate ( $\text{Ni}(\text{NO}_3)_2 \cdot 6\text{H}_2\text{O}$ , CARLO ERBA, purity  $\geq 98.5\%$ ) and ammonium perrhenate ( $\text{NH}_4\text{ReO}_4$ , Sigma-Aldrich Pte. Ltd., purity  $\geq 99\%$ ) were used as the respective metal precursors for Ni and Re. A 25 wt.% ammonia solution was procured from ANaPURE™ (New Zealand). Levulinic acid (Sigma-Aldrich Pte. Ltd., 98% purity) and 2-propanol (QREC Chemical, analytical reagent grade,  $>99\%$ ) were used as the reactant and solvent, respectively. 2-PrOD (isotopic purity = 98 atom% D) and  $\text{D}_2$  (isotopic purity = 99.8 atom% D) were purchased from Sigma-Aldrich Pte. Ltd. Deionized water was used throughout all synthesis and washing procedures. All chemicals were of analytical grade and used as received.

## 2 Catalyst Characterizations information.

The textural properties of the calcined catalysts were analyzed by  $\text{N}_2$  physisorption at  $-196^\circ\text{C}$  using a BELSORP mini II (MicrotracBEL, Japan) gas sorption analyzer. The specific surface area was calculated by the BET method, while pore volume and pore size distribution were obtained from the desorption branch using the BJH model. The actual metallic contents of the calcined samples were determined by inductively coupled plasma-optical emission spectroscopy (ICP-OES, PerkinElmer NexION® 2000). Prior to analysis, solid samples were digested in acid under microwave irradiation. Chemisorption analyses were performed using a Quantachrome TPRWin v4.10 analyzer.  $\text{H}_2$  temperature-programmed reduction ( $\text{H}_2$ -TPR) and temperature-programmed desorption of  $\text{NH}_3$  and  $\text{H}_2$  ( $\text{NH}_3$ -TPD and  $\text{H}_2$ -TPD) were conducted following established procedures to determine the reducibility, hydrogen uptake, and surface acidity of the catalysts. Raman spectroscopy (PerkinElmer Spectrum™ GX) was used to investigate the metal-support interactions and structural evolution of the calcined catalysts. The nature and strength of Lewis and Brønsted acid sites were examined using pyridine-adsorbed diffuse reflectance infrared Fourier-transform spectroscopy (pyridine-DRIFTS) on a Nicolet iS50 FTIR spectrometer equipped with a mercury–cadmium telluride (MCT) detector and a Harrick reaction cell (ZnSe windows). Samples were pretreated at  $150^\circ\text{C}$  under Ar (30 sccm) for 1 h to remove physisorbed water, followed by in situ reduction in  $\text{H}_2$  (30 sccm) at  $450^\circ\text{C}$  for 3 h. After cooling to  $30^\circ\text{C}$ ,

pyridine was adsorbed and spectra were recorded between 650–4000  $\text{cm}^{-1}$  (4  $\text{cm}^{-1}$  resolution, 64 scans). CO-DRIFTS was carried out using the same setup to probe surface metal sites. After activation, CO adsorption was performed at 0 °C using 10% CO/He (30 sccm for 20 min), and temperature-resolved spectra were recorded at 50, 100, 150, and 200 °C under flowing Ar. Additionally, time-resolved DRIFTS was employed to monitor LA adsorption and hydrogenation on activated catalysts at 140 °C under 10 bar  $\text{H}_2$  for 0–40 min. The crystal structure of the calcined and reduced samples was examined using X-ray diffraction (XRD) over the  $2\theta$  range of 10°–80° (step time: 0.5 s). Structural evolution during in situ  $\text{H}_2$  reduction (50–500 °C, held at 500 °C for 3 h) was investigated by in situ X-ray absorption spectroscopy (XAS) at Beamline 2.2, Synchrotron Light Research Institute (Thailand). The calcined samples were diluted with boron nitride (BN), pelletized, and analyzed in transmission mode at the Ni K-edge and Re  $\text{L}_{3\text{-edge}}$  using corresponding metal foils for energy calibration. Data were analyzed using the ATHENA software, while linear combination fitting (LCF) was used to quantify metallic fractions. Wavelet transform (WT) analyses were performed using the HAMA program (k-range: 0–15  $\text{\AA}^{-2}$ , R-range: 0–6  $\text{\AA}$ ) with a Morlet wavelet. X-ray photoelectron spectroscopy (XPS) was performed using an AXIS SUPRA spectrometer (Kratos Analytical) with a monochromatic Al  $\text{K}\alpha$  X-ray source. The calcined samples were reduced ex situ at 500 °C for 3 h and passivated in 1%  $\text{O}_2/\text{Ar}$  for 1 h prior to measurement. Binding energies were calibrated to the C 1s peak at 284.6 eV, and spectra were deconvoluted using XPSPEAK41 software. The morphology, particle size distribution, and lattice fringes of the reduced catalysts were analyzed by transmission electron microscopy (TEM) and energy-dispersive X-ray spectroscopy (EDS) on a JEOL JEM-3100F microscope operated at 300 kV. Thermal stability and coke deposition of the reduced and spent catalysts were evaluated by thermogravimetric analysis (TGA, Mettler Toledo, Switzerland). The liquid products after catalytic reactions were separated using chloroform and analyzed by gas chromatography–mass spectrometry (GC-MS, Agilent 7890A) to identify reaction intermediates and products. Isotopic distribution in products obtained under  $\text{H}_2/\text{D}_2$  or 2-propanol (2-PrOH) and deuterated analogue (2-PrOD) conditions was analyzed to elucidate hydrogen/proton participation during hydrogenation.  $^1\text{H}$  NMR spectra were recorded on a Bruker Avance Ascend 600 MHz spectrometer using Topspin 4.4.1 software, employing  $\text{D}_2\text{O}$  for water-based and  $\text{CD}_3\text{OD}$  for 2-propanol-based reactions, confirming solvent-derived hydrogen transfer in the reaction mechanism.

**Table S1** Summary of the XPS results obtained from the reduced catalysts.

| Sample  | Binding energy (eV) |       |                  |                  |       |       |                  |                  |                  | Atomic concentration (%) <sup>a</sup> |     |      |     |      | Metallic Fraction      |                        |
|---------|---------------------|-------|------------------|------------------|-------|-------|------------------|------------------|------------------|---------------------------------------|-----|------|-----|------|------------------------|------------------------|
|         | Ni 2p               |       |                  |                  |       | Re 4f |                  |                  |                  | Ni                                    | Re  | Si   | C   | O    | Ni <sup>b</sup><br>(0) | Re <sup>c</sup><br>(0) |
|         | Ni <sup>0</sup>     | NiO   | Ni <sup>2+</sup> | Ni <sup>δ+</sup> | Sat.  | Re    | Re <sup>4+</sup> | Re <sup>6+</sup> | Re <sup>7+</sup> |                                       |     |      |     |      |                        |                        |
| Ni-IM   | 852.3               | 854.0 | 855.5            | 856.5            | 860.5 | -     | -                | -                | -                | 1.2                                   | 0.0 | 30.7 | 6.0 | 62.1 | 0.24                   | -                      |
| NiRe-IM | 852.9               | 854.0 | 855.7            | 856.7            | 860.4 | 40.7  | 41.4             | 45.4             | 46.8             | 1.1                                   | 0.2 | 30.3 | 5.8 | 62.6 | 0.11                   | 0.08                   |
|         |                     |       |                  |                  |       | 42.75 | 43.78            | 48.4             | 49.2             |                                       |     |      |     |      |                        |                        |
| Ni-PS   | 852.8               | 854.5 | 855.9            | 857.3            | 861.4 | -     | -                | -                | -                | 4.7                                   | 0.0 | 26.6 | 5.8 | 63.0 | 0.05                   | -                      |
| NiRe-PS | 852.3               | 854.5 | 855.9            | 857.4            | 861.5 | 40.63 | 41.5             | 45.32            | 46.54            | 4.3                                   | 0.5 | 27.1 | 5.5 | 62.8 | 0.09                   | 0.17                   |
|         |                     |       |                  |                  |       | 42.86 | 44               | 48.24            | 49.5             |                                       |     |      |     |      |                        |                        |

<sup>a</sup> atomic concentration calculated from XPS survey

<sup>b</sup> Ni (0) fraction calculated from the ratio of Ni (0) / (Ni (0) + Ni (2+))

<sup>c</sup> Re (0) fraction calculated from the ratio of Re (0) / (Re (0) + Re (4+) + Re (6+) + Re (7+))

**Table S2** Experimental data for kinetic constant.

| Reaction time (min) t | Experiment        |          |          | SD       | R <sup>2</sup> |
|-----------------------|-------------------|----------|----------|----------|----------------|
|                       | 1                 | 2        | Average  |          |                |
|                       | $-\ln (1-X_{LA})$ |          |          |          |                |
| Ni-PS catalyst        |                   |          |          |          |                |
| 60                    | 0.085416          | 0.110933 | 0.098174 | 0.018043 | 0.9837         |
| 90                    | 0.135997          | 0.11877  | 0.127384 | 0.012181 |                |
| 120                   | 0.153979          | 0.133655 | 0.143817 | 0.014371 |                |
| 150                   | 0.151128          | 0.181795 | 0.166461 | 0.021685 |                |
| NiRe-PS catalyst      |                   |          |          |          |                |
| 60                    | 0.303000          | 0.295427 | 0.299214 | 0.005355 | 0.9942         |
| 90                    | 0.500939          | 0.494181 | 0.49756  | 0.004779 |                |
| 120                   | 0.712451          | 0.642765 | 0.677608 | 0.049275 |                |
| 150                   | 0.952098          | 0.957504 | 0.954801 | 0.003823 |                |

**Table S3** Experimental data for activation energy.

| 1/T (K)          | Experiment                                                                 |          |          | SD       | R <sup>2</sup> |
|------------------|----------------------------------------------------------------------------|----------|----------|----------|----------------|
|                  | 1                                                                          | 2        | Average  |          |                |
|                  | $\ln r_{GVL}$ (mmol GVL g <sub>cat</sub> <sup>-1</sup> min <sup>-1</sup> ) |          |          |          |                |
| Ni-PS catalyst   |                                                                            |          |          |          |                |
| 0.0025           | -10.0362                                                                   | -9.96384 | -10.0000 | 0.051166 | 0.9960         |
| 0.0024           | -9.04133                                                                   | -9.03213 | -9.0367  | 0.006505 |                |
| 0.0023           | -8.28326                                                                   | -8.3512  | -8.3172  | 0.048041 |                |
| 0.0022           | -7.50786                                                                   | -7.57072 | -7.5393  | 0.044449 |                |
| NiRe-PS catalyst |                                                                            |          |          |          |                |
| 0.0027           | -9.82799                                                                   | -9.49612 | -9.6621  | 0.234668 | 0.9556         |
| 0.0025           | -8.64478                                                                   | -8.6858  | -8.6653  | 0.029006 |                |
| 0.0024           | -7.27682                                                                   | -7.21071 | -7.2438  | 0.046747 |                |
| 0.0023           | -6.66951                                                                   | -6.67112 | -6.6703  | 0.001138 |                |

**Table S4** Catalytic performance comparison of Ni-based catalysts for levulinic acid (LA) hydrogenation to  $\gamma$ -valerolactone (GVL), highlighting LA conversion and GVL yield.

| Entry | Catalyst                                              | Metal content (wt%) | solvent                                     | T (°C) | time (h) | LA conv. (%) | GVL yield (%) | TOF (h <sup>-1</sup> ) | Rate (mmol GVL/ g <sub>cat</sub> <sup>-1</sup> h <sup>-1</sup> ) | Ref.                                    |
|-------|-------------------------------------------------------|---------------------|---------------------------------------------|--------|----------|--------------|---------------|------------------------|------------------------------------------------------------------|-----------------------------------------|
| 1     | Ni3-Zn1@OMC                                           | Ni:13.5, Zn: 5      | Water                                       | 140    | 2        | 74           | 61            | 2.7                    | 8.4                                                              | (Tang et al. 2023) <sup>1</sup>         |
| 2     | Ni/Ru@WOMC                                            | Ni: 9.6, Ru: 0.9    | 2-propanol                                  | 160    | 2        | 100          | 100           | 5.0                    | 8.6                                                              | (Wang et al. 2023) <sup>2</sup>         |
| 3     | 30%Ni/O-clay450N                                      | Ni: 26.31           | 1,4-Dioxane                                 | 140    | 5        | 100          | 100           | 1.3                    | 5.7                                                              | (Kamble et al. 2023) <sup>3</sup>       |
| 4     | Ni-Al                                                 | Ni: 53.30           | Ethanol                                     | 140    | 2        | 100          | 97            | 4.5                    | 41.2                                                             | (Shao et al. 2022) <sup>4</sup>         |
| 5     | S3M1.5@NiPS-600                                       | Ni: 24.3            | Ethyl acetate, dodecane (internal standard) | 150    | 3        | 95           | 91            | 1.9                    | 7.9                                                              | (Li, Hsieh, and Lin 2022) <sup>5</sup>  |
| 6     | 1-Ni/C-400                                            | Ni: 6.6             | water                                       | 160    | 3        | 100          | 95            | 7.2                    | 8.1                                                              | (Fang et al. 2019) <sup>6</sup>         |
| 7     | 500-NiFe NPs@C (3:1)                                  | Ni: 14.95, Fe: 4.93 | isopropanol                                 | 130    | 2        | 94           | 90            | 2.2                    | 7.5                                                              | (Wang et al. 2018) <sup>7</sup>         |
| 8     | Ni@FLG-600                                            | Ni : 57.5           | water (1,4-dioxane:internal standard)       | 130    | 7        | 99           | 99            | 0.2                    | 1.8                                                              | (Zhang, Li et al. 2025) <sup>8</sup>    |
| 9     | NiRe <sub>0.075</sub> /Al <sub>2</sub> O <sub>3</sub> | Ni: 10.1, Re: 2.5   | 2-propanol                                  | 160    | 2        | 100          | 93            | 10.8                   | 20.1                                                             | (Y. Maneewong et al. 2025) <sup>9</sup> |
| 10    | NiRe-PS                                               | Ni : 8.1, Re :2.3   | 2-propanol                                  | 160    | 2        | 100          | 91.6          | 26.3                   | 39.4                                                             | This work                               |



**Table S5** ICP–OES analysis of fresh and spent catalysts.

| Sample                 | Elemental Composition from ICP (%) |          |
|------------------------|------------------------------------|----------|
|                        | Ni (wt%)                           | Re (wt%) |
| Fresh NiRe-MCM41-PS    | 8.1                                | 2.3      |
| NiRe- PS After 1st run | 6.9                                | 2.3      |
| NiRe- PS After 5th run | 6.8                                | 1.9      |

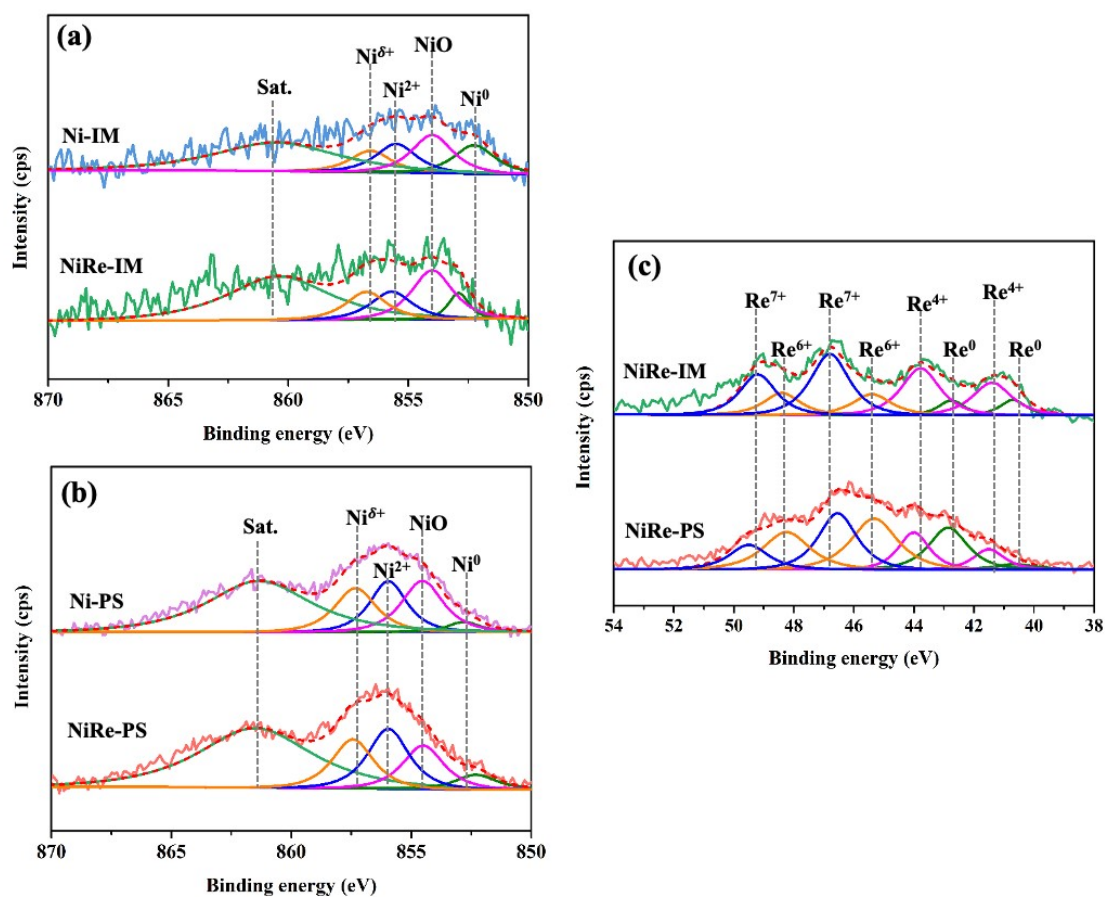

**Figure S1** X-ray photoelectron spectroscopy (XPS) spectra of reduced and passivated catalysts: **(a)** and **(b)** Ni 2p and **(c)** Re 4f regions.

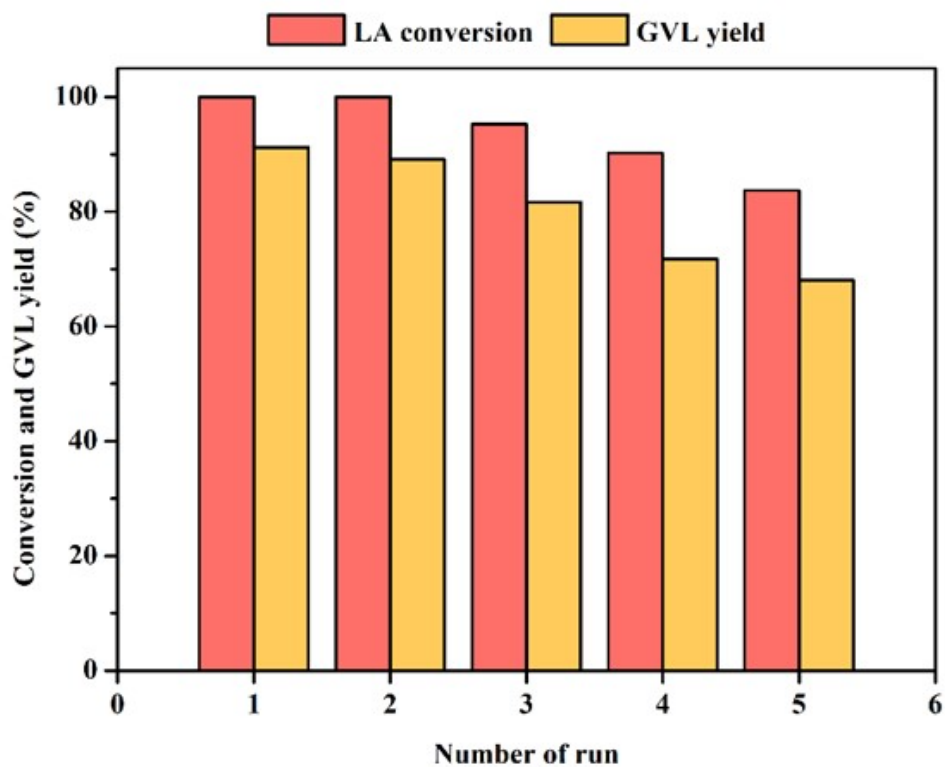

**Figure S2** Reusability of the NiRe-PS catalyst over five consecutive catalytic cycles under identical reaction conditions (160 °C, 10 bar H<sub>2</sub>, 2 h, 0.1 g catalyst).

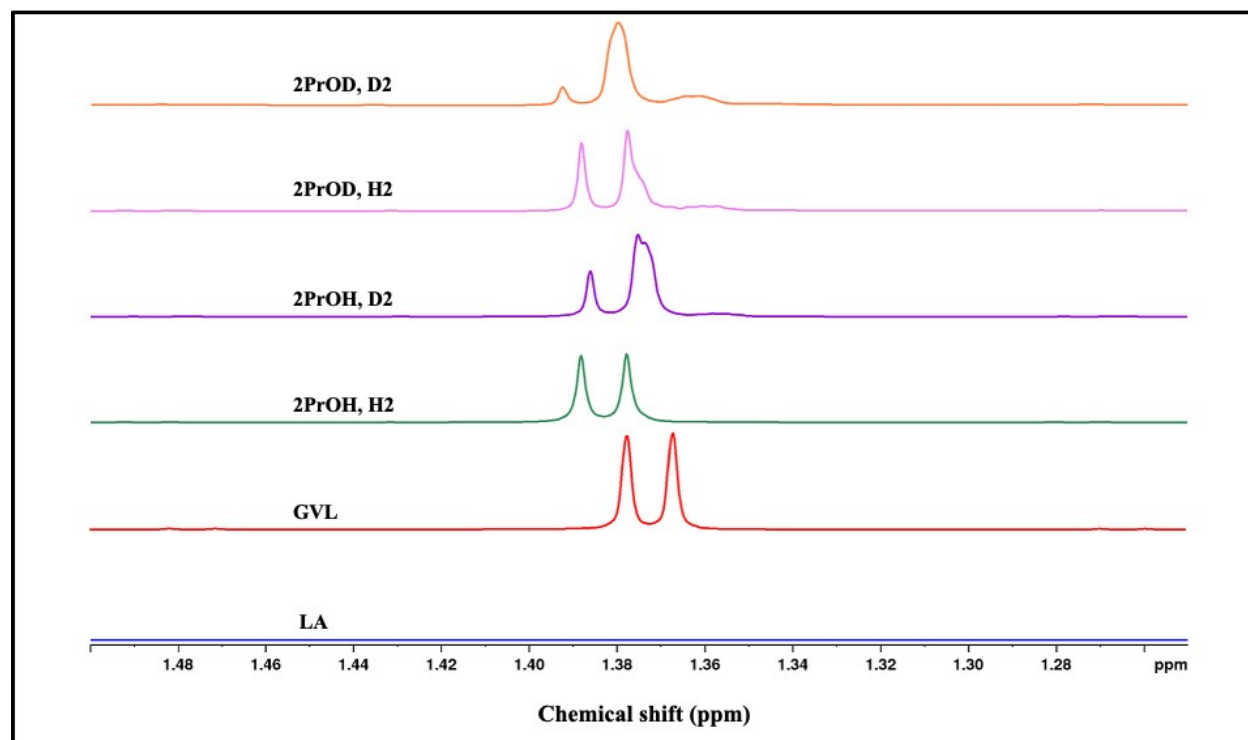

**Figure S3**  $^1\text{H}$  NMR spectrum of the reaction product obtained over the NiRe-PS catalyst.

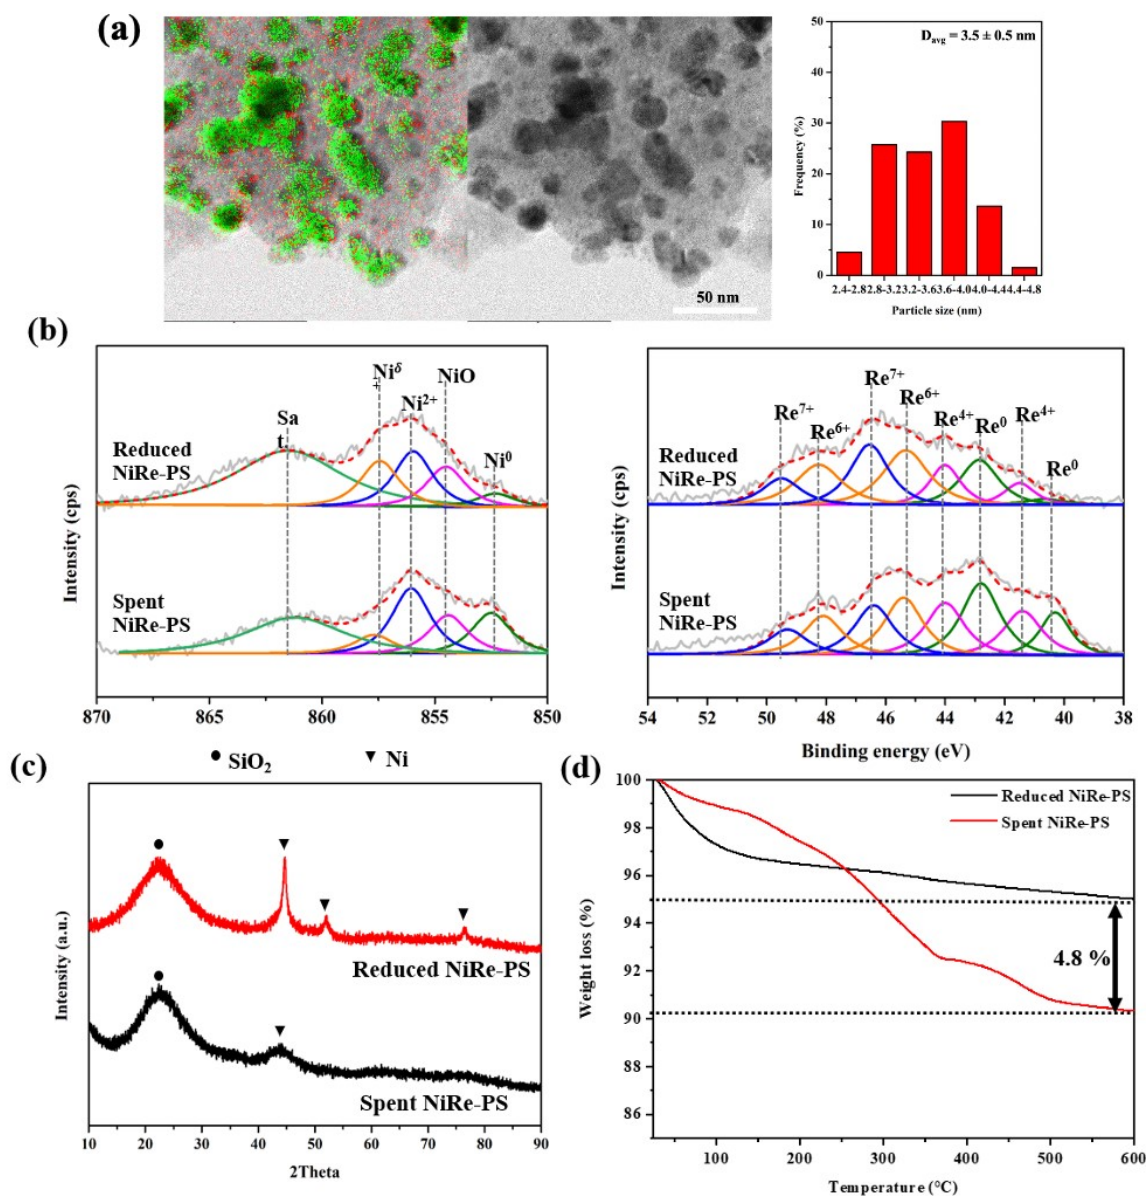

**Figure S4** Spent catalyst characterization of NiRe-PS after the first catalytic run (160 °C, 2 h, 0.1 g catalyst, 10 bar  $H_2$ ): (a) TEM and elemental mapping showing uniform Ni (green) and Re (red) dispersion with minimal agglomeration; (b) XPS spectra of Ni 2p and Re 4f regions revealing slight surface oxidation of  $Ni^0$  and  $Re^0$  after reaction; (c) XRD patterns confirming preserved mesostructure with minor Ni peak attenuation; and (d) TGA profiles showing increased weight loss due to minor carbonaceous deposition.

## References

1. Y. Tang, J. Fu, Y. Wang, H. Guo and X. Qi, *Fuel Processing Technology*, 2023, **240**, 107559.
2. X. Wang, X. Qi, M. Qiu, F. Shen, J. Yang and B. Shen, *Fuel*, 2023, **341**, 127720.
3. P. A. Kamble, C. Vinod, V. K. Rathod and M. L. Kantam, *Catalysis Today*, 2023, **408**, 36-49.
4. Y. Shao, K. Sun, M. Fan, J. Wang, G. Gao, L. Zhang, S. Zhang and X. Hu, *Chemical Engineering Science*, 2022, **248**, 117258.
5. C.-C. Li, C.-H. Hsieh and Y.-C. Lin, *Molecular Catalysis*, 2022, **523**, 111720.
6. S. Fang, Z. Cui, Y. Zhu, C. Wang, J. Bai, X. Zhang, Y. Xu, Q. Liu, L. Chen and Q. Zhang, *Journal of Energy Chemistry*, 2019, **37**, 204-214.
7. H. Wang, C. Chen, H. Zhang, G. Wang and H. Zhao, *Chinese Journal of Catalysis*, 2018, **39**, 1599-1607.
8. Y. Zhang, Y. Li, C. Shen, C. Yang, H. Wu, C. Jiang, S. Chen, M. Li, Y. Li and W. Ding, *Applied Catalysis B: Environment and Energy*, 2025, **361**, 124595.
9. Y. Maneewong, P. Nimmanterdwong, S. Ratchahat, C. Sakdaronnarong, W. Limphirat, P. Khemthong, B. Rungtaweeworanit, K. Faungnawakij, S. Assabumrungrat and Y.-C. Lin, *Chemical Engineering Journal*, 2025, **508**, 160969.
